# Supplementary material for: Transcriptome and Metabolome Analyses of Glucosinolate Biosynthesis-Related Genes in Different Organs of Broccoli (Brassica oleracea L. var. italica)
Source: MDPI journal article supplement (doi:10.3390/app13105837), 2023-05-09
Supplement: s1 [file s1]

Archive with 2 entries (2 files):
- Supplementary Figures.pdf
- Supplementary Tables.xls
