# Supplementary material for: Transcriptome and Metabolome Analyses of Glucosinolate Biosynthesis-Related Genes in Different Organs of Broccoli (Brassica oleracea L. var. italica)
Source: MDPI journal article supplement (doi:10.3390/app13105837), 2023-05-09
Supplement: s1 [file s1 › Supplementary Tables.xls]

## Sheet: Supplementary Table S1
Supplementary Table S1 Types and contents of glucosinolates in the two parental lines.
Semisystematic name	Trivial name	Abbreviation	B0401(umol/g DW)	MS84003 (umol/g DW)
(RS)-4-(methylsulfinyl)butyl GSL	Glucoraphanin	RAA	2.39941	7.90912
Indol-3-methyl GSL	Glucobrassicin	GBC	3.47307	3.07357
4-(Methylsulfanyl)butyl GSL	Glucoerucin	ERU	0.129972	0.25327
(RS)-5-(Methylsulfinyl)pentyl GSL	Glucoalyssin	ALY	0.0163647	0.0477762
4-Methoxyindol-3-ylmethyl GSL	4-Methoxyglucobrassicin	4ME	0.659448	0.749225
1-Methoxyindol-3-ylmethyl GSL	Neoglucobrassicin	NEO	2.43237	2.05849
Benzyl GSL	Glucotropaeolin	TRO	0.00790215	0.0189563

## Sheet: Supplementary Table S2
Table S2 Sequencing, assembly statistics and comparative efficiency statistics for the 3 pairs transcriptomes of leaf, stalk and floret, respectively.
Sample	Raw Reads	Clean Reads	Clean Base(G)	Error Rate(%)	Q20(%)	Q30(%)	GC Content(%)	Reads mapped	Unique mapped	Multi mapped	Read1 mapped	Read2 mapped	'+' mapped	'-' mapped
LTH1	48269810	43323000	6.5	0.03	97.05	91.82	47.36	37976119(87.66%)	36729083(84.78%)	2064843(2.88%)	18436842(42.56%)	18292241(42.22%)	18324596(42.30%)	18404487(42.48%)
LTH2	45710962	41924478	6.29	0.03	97.85	93.87	47.72	37317602(89.01%)	35989737(85.84%)	2365120(3.17%)	17966753(42.86%)	18022984(42.99%)	17963603(42.85%)	18026134(43.00%)
LTH3	45890848	43243084	6.49	0.03	97.82	93.73	47.78	38887388(89.93%)	37558141(86.85%)	2312426(3.07%)	18764207(43.39%)	18793934(43.46%)	18754839(43.37%)	18803302(43.48%)
LTL1	46828356	43227694	6.48	0.03	97.86	93.85	47.67	38908977(90.01%)	37415089(86.55%)	2657234(3.46%)	18679071(43.21%)	18736018(43.34%)	18679339(43.21%)	18735750(43.34%)
LTL2	47910524	45064522	6.76	0.03	97.91	93.93	47.4	40702954(90.32%)	39269021(87.14%)	2471877(3.18%)	19602354(43.50%)	19666667(43.64%)	19599751(43.49%)	19669270(43.65%)
LTL3	47058370	45266896	6.79	0.03	97.76	93.57	47.28	41031763(90.64%)	39557565(87.39%)	2383308(3.26%)	19771220(43.68%)	19786345(43.71%)	19752563(43.64%)	19805002(43.75%)
STH1	48336382	44829476	6.72	0.03	97.78	93.68	47.22	39824525(88.84%)	38518104(85.92%)	2294737(2.91%)	19241832(42.92%)	19276272(43.00%)	19237934(42.91%)	19280170(43.01%)
STH2	44913518	43353200	6.5	0.03	97.5	92.97	47.2	38569367(88.97%)	37243381(85.91%)	2372451(3.06%)	18648083(43.01%)	18595298(42.89%)	18634629(42.98%)	18608752(42.92%)
STH3	47283740	43033808	6.46	0.03	97.81	93.76	47.03	38179390(88.72%)	36967167(85.90%)	2033491(2.82%)	18453679(42.88%)	18513488(43.02%)	18452990(42.88%)	18514177(43.02%)
STL1	46916480	43215446	6.48	0.03	97.72	93.5	47.15	38533516(89.17%)	37197453(86.07%)	2417955(3.09%)	18574400(42.98%)	18623053(43.09%)	18570904(42.97%)	18626549(43.10%)
STL2	47371900	45430736	6.81	0.03	97.73	93.52	47.14	40881117(89.99%)	39618654(87.21%)	2059754(2.78%)	19799470(43.58%)	19819184(43.63%)	19786577(43.55%)	19832077(43.65%)
STL3	45335528	43680586	6.55	0.03	97.55	93.07	47.06	39256347(89.87%)	38057650(87.13%)	1947112(2.74%)	19045298(43.60%)	19012352(43.53%)	19001433(43.50%)	19056217(43.63%)
FTH1	51714824	50455966	7.57	0.03	97.84	93.6	46.8	44788647(88.77%)	43589673(86.39%)	1198974(2.38%)	21815134(43.24%)	21774539(43.16%)	21794666(43.20%)	21795007(43.20%)
FTH2	44863194	43512132	6.53	0.03	97.67	93.32	46.68	38358303(88.16%)	37347453(85.83%)	1010850(2.32%)	18659369(42.88%)	18688084(42.95%)	18671050(42.91%)	18676403(42.92%)
FTH3	68378426	66898954	10.03	0.03	97.98	94.01	46.67	59429834(88.84%)	57871796(86.51%)	1558038(2.33%)	28941531(43.26%)	28930265(43.24%)	28939440(43.26%)	28932356(43.25%)
FTL1	51629206	50416150	7.56	0.03	98	94.02	46.44	44818832(88.90%)	43615596(86.51%)	1203236(2.39%)	21800936(43.24%)	21814660(43.27%)	21801661(43.24%)	21813935(43.27%)
FTL2	47115506	46068282	6.91	0.03	97.71	93.37	46.32	40736223(88.43%)	39555545(85.86%)	1180678(2.56%)	19744759(42.86%)	19810786(43.00%)	19767493(42.91%)	19788052(42.95%)
FTL3	47167608	46032740	6.9	0.02	98.1	94.3	46.27	40973384(89.01%)	39770403(86.40%)	1202981(2.61%)	19860415(43.14%)	19909988(43.25%)	19879045(43.18%)	19891358(43.21%)

## Sheet: Supplementary Table S3
Table S3 Summary of the DEGs and DAMs among 3 library pairs.
Group	Up	Down	Fales	Total
LTL vs LTHa	203	336	28471	29010
STL vs STHa	402	353	28672	29427
FTL vs FTHa	308	309	31263	31880
LML vs LMHb	14	30	713	757
SML vs SMHb	33	33	668	734
FML vs FMHb	89	29	884	1002
atranscriptome; bmetabolome.

## Sheet: Supplementary Table S4
Table S4 twenty co-regulated DEGs statistics.
ID	chr	start	end	Swissprot
Bo9g004100	C9	643432	645834	NAC69_ARATH RecName: Full=NAC domain-containing protein 69 {ECO:0000303|PubMed:15029955}; Short=ANAC069 {ECO:0000303|PubMed:15029955}; AltName: Full=Protein NAC WITH TRANSMEMBRANE MOTIF 2; AltName: Full=Protein NTM1-like 13 {ECO:0000303|PubMed:17158162};
Bo4g195650	C4	52992217	52994660	C76C4_ARATH RecName: Full=Cytochrome P450 76C4; EC=1.14.-.-;
Bo00722s120	Scaffold00722	78287	78955	KTI2_ARATH RecName: Full=Kunitz trypsin inhibitor 2 {ECO:0000303|PubMed:30042779}; Short=AtKTI2 {ECO:0000303|PubMed:30042779}; AltName: Full=Cysteine protease inhibitor WSCP {ECO:0000305}; AltName: Full=Kunitz-type cysteine protease inhibitor WSCP {ECO:0000305}; AltName: Full=Water-soluble chlorophyll protein {ECO:0000303|PubMed:26016527}; Short=AtWSCP {ECO:0000303|PubMed:26016527}; Flags: Precur…
Bo5g017400	C5	5812354	5814239	CSCL7_ARATH RecName: Full=CSC1-like protein At1g11960;
Bo00722s110	Scaffold00722	66549	67217	KTI2_ARATH RecName: Full=Kunitz trypsin inhibitor 2 {ECO:0000303|PubMed:30042779}; Short=AtKTI2 {ECO:0000303|PubMed:30042779}; AltName: Full=Cysteine protease inhibitor WSCP {ECO:0000305}; AltName: Full=Kunitz-type cysteine protease inhibitor WSCP {ECO:0000305}; AltName: Full=Water-soluble chlorophyll protein {ECO:0000303|PubMed:26016527}; Short=AtWSCP {ECO:0000303|PubMed:26016527}; Flags: Precur…
Bo01163s010	Scaffold01163	581	6158	LOX2_ARATH RecName: Full=Lipoxygenase 2, chloroplastic; Short=AtLOX2; EC=1.13.11.12; Flags: Precursor;
Bo3g041960	C3	17047439	17049631	TAT3_ARATH RecName: Full=Probable aminotransferase TAT3; EC=2.6.1.-; AltName: Full=Tyrosine aminotransferase 3;
Bo03321s010	Scaffold03321	303	1033	--
Bo02274s010	Scaffold02274	125	1574	RAB7_GOSHI RecName: Full=Ras-related protein Rab7;
Bo9g009980	C9	2856870	2857451	Y4844_ARATH RecName: Full=Uncharacterized protein At4g28440;
Bo3g070280	C3	27485943	27487781	CSN2_ARATH RecName: Full=COP9 signalosome complex subunit 2; Short=Signalosome subunit 2; AltName: Full=Protein FUSCA 12;
Bo2g155030	C2	48110302	48111282	RING2_ARATH RecName: Full=E3 ubiquitin-protein ligase At1g63170; EC=2.3.2.27; AltName: Full=RING finger protein At1g63170; AltName: Full=RING-type E3 ubiquitin transferase At1g63170 {ECO:0000305};
Bo4g188900	C4	50917048	50917343	--
Bo9g005550	C9	986887	992301	XDH1_ARATH RecName: Full=Xanthine dehydrogenase 1; Short=AtXDH1; EC=1.17.1.4 {ECO:0000269|PubMed:14726515};
Bo3g003410	C3	1188753	1191318	JOX2_ARATH RecName: Full=Jasmonate-induced oxygenase 2 {ECO:0000303|PubMed:28559313}; EC=1.14.11.- {ECO:0000269|PubMed:28559313, ECO:0000269|PubMed:28760569, ECO:0000269|PubMed:33516967}; AltName: Full=2-oxoglutarate-dependent dioxygenase JOX2 {ECO:0000305}; AltName: Full=Jasmonic acid oxidase 2 {ECO:0000303|PubMed:28760569};
Bo1g123080	C1	36572300	36573670	--
novel.3242	C5	29980698	29981601	--
Bo9g004510	C9	925617	928355	SUD1_ARATH RecName: Full=Probable E3 ubiquitin ligase SUD1; EC=2.3.2.27; AltName: Full=Protein ECERIFERUM 9; AltName: Full=Protein SUPPRESSOR OF DRY2 DEFFECTS 1; Short=AtSUD1; AltName: Full=RING-type E3 ubiquitin transferase SUD1 {ECO:0000305}; AltName: Full=RING/U-box domain-containing protein;
Bo4g194400	C4	52359704	52360151	DEF2_SINAL RecName: Full=Defensin-like protein 2; AltName: Full=MTI-2; AltName: Full=Trypsin inhibitor 2; Flags: Precursor;
Bo9g013680	C9	3888706	3889850	6PGL3_ARATH RecName: Full=6-phosphogluconolactonase 3, chloroplastic {ECO:0000305}; Short=6PGL3 {ECO:0000305}; EC=3.1.1.31 {ECO:0000269|PubMed:19457984}; AltName: Full=Protein EMBRYO DEFECTIVE 2024 {ECO:0000303|PubMed:15266054}; Flags: Precursor;

## Sheet: Supplementary Table S5
Table S5 The top ten GO pathways of DEGs enrichment degree.
Organ	Ontology	ID	Description	GeneRatio	BgRatio	P-value	P-adjust	Count	Up	Down
Leaf	Cellular component	GO:0099503	secretory vesicle	14/353	379/39126	1.08011e-05	0.00173898	14	9	5
	Cellular component	GO:0005887	integral component of plasma membrane	9/353	246/39126	0.000432936	0.0348513	9	3	6
	Cellular component	GO:0000325	plant-type vacuole	9/353	491/39126	0.035415	0.783373	9	3	6
	Cellular component	GO:0005742	mitochondrial outer membrane translocase complex	2/353	25/39126	0.0212366	0.68382	2	2	0
	Cellular component	GO:0098799	outer mitochondrial membrane protein complex	2/353	33/39126	0.035659	0.783373	2	2	0
	Cellular component	GO:0005788	endoplasmic reticulum lumen	3/353	106/39126	0.0713657	0.783373	3	2	1
	Cellular component	GO:0005665	RNA polymerase II, core complex	2/353	58/39126	0.0965585	0.783373	2	1	1
	Cellular component	GO:0010319	stromule	5/353	84/39126	0.00100136	0.0537398	5	0	5
	Cellular component	GO:0009514	glyoxysome	3/353	45/39126	0.00780829	0.314284	3	0	3
	Cellular component	GO:0030286	dynein complex	1/353	11/39126	0.0948971	0.783373	1	0	1
	Biological process	GO:0019760	glucosinolate metabolic process	13/322	323/34639	1.21529e-05	0.00193925	13	12	1
	Biological process	GO:0016143	S-glycoside metabolic process	13/322	323/34639	1.21529e-05	0.00193925	13	12	1
	Biological process	GO:0019757	glycosinolate metabolic process	13/322	323/34639	1.21529e-05	0.00193925	13	12	1
	Biological process	GO:0080027	response to herbivore	12/322	90/34639	4.86371e-11	5.43276e-08	12	9	3
	Biological process	GO:0009625	response to insect	9/322	126/34639	2.94528e-06	0.00082247	9	7	2
	Biological process	GO:0031408	oxylipin biosynthetic process	7/322	56/34639	8.82067e-07	0.000492635	7	5	2
	Biological process	GO:0031407	oxylipin metabolic process	7/322	63/34639	1.99044e-06	0.000741108	7	5	2
	Biological process	GO:0009695	jasmonic acid biosynthetic process	6/322	57/34639	1.49993e-05	0.00209428	6	5	1
	Biological process	GO:0010597	green leaf volatile biosynthetic process	5/322	43/34639	4.84821e-05	0.00601717	5	5	0
	Molecular function	GO:0016701	oxidoreductase activity, acting on single donors with incorporation of molecular oxygen	7/348	86/36530	1.88977e-05	0.00308232	7	5	2
	Molecular function	GO:0016165	linoleate 13S-lipoxygenase activity	6/348	19/36530	1.74969e-08	6.8413e-06	6	5	1
	Molecular function	GO:0016702	oxidoreductase activity, acting on single donors with incorporation of molecular oxygen, incorporation of two atoms of oxygen	6/348	64/36530	3.37082e-05	0.00329498	6	5	1
	Molecular function	GO:0004869	cysteine-type endopeptidase inhibitor activity	7/348	89/36530	2.36495e-05	0.00308232	7	4	3
	Molecular function	GO:0004866	endopeptidase inhibitor activity	7/348	131/36530	0.000272542	0.0147412	7	4	3
	Molecular function	GO:0061135	endopeptidase regulator activity	7/348	133/36530	0.000298924	0.0147412	7	4	3
	Molecular function	GO:0030414	peptidase inhibitor activity	7/348	137/36530	0.000357833	0.0147412	7	4	3
	Molecular function	GO:0061134	peptidase regulator activity	7/348	140/36530	0.000407837	0.0147412	7	4	3
	Molecular function	GO:0043295	glutathione binding	4/348	35/36530	0.000335671	0.0147412	4	3	1
	Molecular function	GO:1900750	oligopeptide binding	4/348	35/36530	0.000335671	0.0147412	4	3	1
Stalk	Cellular component	GO:0099503	secretory vesicle	16/502	379/39126	3.8019e-05	0.00520861	16	8	8
	Cellular component	GO:0005615	extracellular space	10/502	343/39126	0.0138829	0.633987	10	7	3
	Cellular component	GO:0044421	extracellular region part	10/502	381/39126	0.0264343	0.905374	10	7	3
	Cellular component	GO:0017053	transcriptional repressor complex	3/502	38/39126	0.0126992	0.633987	3	1	2
	Cellular component	GO:0017119	Golgi transport complex	2/502	33/39126	0.0668223	0.996989	2	1	1
	Cellular component	GO:0009514	glyoxysome	2/502	45/39126	0.11353	0.996989	2	1	1
	Cellular component	GO:0005677	chromatin silencing complex	2/502	27/39126	0.0466902	0.996989	2	0	2
	Cellular component	GO:0090568	nuclear transcriptional repressor complex	2/502	28/39126	0.0498649	0.996989	2	0	2
	Cellular component	GO:0010168	ER body	2/502	29/39126	0.0531151	0.996989	2	0	2
	Cellular component	GO:0046861	glyoxysomal membrane	1/502	11/39126	0.132435	0.996989	1	0	1
	Biological process	GO:0007623	circadian rhythm	25/467	362/34639	3.64714e-11	1.72631e-08	25	22	3
	Biological process	GO:0009873	ethylene-activated signaling pathway	27/467	468/34639	3.4291e-10	1.21733e-07	27	20	7
	Biological process	GO:0071369	cellular response to ethylene stimulus	27/467	490/34639	9.3484e-10	2.65495e-07	27	20	7
	Biological process	GO:0009867	jasmonic acid mediated signaling pathway	17/467	298/34639	7.66089e-07	0.000108785	17	15	2
	Biological process	GO:0080027	response to herbivore	15/467	90/34639	1.28526e-12	9.12532e-10	15	12	3
	Biological process	GO:0009751	response to salicylic acid	23/467	497/34639	3.80422e-07	7.71712e-05	23	12	11
	Biological process	GO:0010200	response to chitin	18/467	325/34639	5.59077e-07	9.92362e-05	18	7	11
	Biological process	GO:0009864	induced systemic resistance, jasmonic acid mediated signaling pathway	7/467	28/34639	7.1751e-08	1.69811e-05	7	6	1
	Biological process	GO:2000030	regulation of response to red or far red light	10/467	95/34639	6.55279e-07	0.000103388	10	4	6
	Biological process	GO:0048511	rhythmic process	30/467	385/34639	1.66307e-14	2.36155e-11	30	2	28
	Molecular function	GO:0004869	cysteine-type endopeptidase inhibitor activity	9/482	89/36530	2.81087e-06	0.00130987	9	9	0
	Molecular function	GO:0004866	endopeptidase regulator activity	9/482	131/36530	6.42297e-05	0.0083272	9	9	0
	Molecular function	GO:0061135	endopeptidase inhibitor activity	9/482	133/36530	7.22417e-05	0.0083272	9	9	0
	Molecular function	GO:0030414	peptidase inhibitor activity	9/482	137/36530	9.0804e-05	0.0083272	9	9	0
	Molecular function	GO:0061134	peptidase regulator activity	9/482	140/36530	0.000107217	0.0083272	9	9	0
	Molecular function	GO:0051213	dioxygenase activity	13/482	351/36530	0.000882351	0.046007	13	6	7
	Molecular function	GO:0004020	adenylylsulfate kinase activity	4/482	16/36530	4.80388e-05	0.0083272	4	4	0
	Molecular function	GO:0008083	growth factor activity	4/482	32/36530	0.000803199	0.046007	4	4	0
	Molecular function	GO:0016847	1-aminocyclopropane-1-carboxylate synthase activity	3/482	15/36530	0.000923007	0.046007	3	2	1
	Molecular function	GO:0016701	oxidoreductase activity, acting on single donors with incorporation of molecular oxygen	6/482	86/36530	0.000987274	0.046007	6	2	4
	Molecular function	GO:0015116	sulfate transmembrane transporter activity	4/482	37/36530	0.00140052	0.0593311	4	2	2
Floret	Cellular component	GO:0012511	monolayer-surrounded lipid storage body	11/385	46/38775	7.83865e-13	1.00335e-10	11	11	0
	Cellular component	GO:0005811	lipid droplet	12/385	114/38775	1.72198e-09	1.10207e-07	12	11	1
	Cellular component	GO:0005764	lysosome	6/385	111/38775	0.000869193	0.0278142	6	5	1
	Cellular component	GO:0000323	lytic vacuole	6/385	122/38775	0.00141697	0.0362745	6	5	1
	Cellular component	GO:0070505	pollen coat	3/385	16/38775	0.000494087	0.0210811	3	3	0
	Cellular component	GO:0031012	extracellular matrix	3/385	37/38775	0.00587697	0.125375	3	3	0
	Cellular component	GO:0005750	mitochondrial respiratory chain complex III	2/385	30/38775	0.0356235	0.538102	2	2	0
	Cellular component	GO:0045275	respiratory chain complex III	2/385	31/38775	0.0378353	0.538102	2	2	0
	Cellular component	GO:0005815	microtubule organizing center	2/385	35/38775	0.0471817	0.603925	2	2	0
	Cellular component	GO:0005788	endoplasmic reticulum lumen	4/385	104/38775	0.0202451	0.370197	4	1	3
	Biological process	GO:1901657	glycosyl compound metabolic process	14/329	473/34195	0.00022559	0.0260969	14	13	1
	Biological process	GO:0019760	glucosinolate metabolic process	12/329	321/34195	7.42483e-05	0.0101163	12	11	1
	Biological process	GO:0016143	S-glycoside metabolic process	12/329	321/34195	7.42483e-05	0.0101163	12	11	1
	Biological process	GO:0019757	glycosinolate metabolic process	12/329	321/34195	7.42483e-05	0.0101163	12	11	1
	Biological process	GO:0016144	S-glycoside biosynthetic process	9/329	127/34195	4.15161e-06	0.00113131	9	9	0
	Biological process	GO:0019758	glycosinolate biosynthetic process	9/329	127/34195	4.15161e-06	0.00113131	9	9	0
	Biological process	GO:0019761	glucosinolate biosynthetic process	9/329	127/34195	4.15161e-06	0.00113131	9	9	0
	Biological process	GO:1901659	glycosyl compound biosynthetic process	9/329	182/34195	7.29859e-05	0.0101163	9	9	0
	Biological process	GO:0009625	response to insect	9/329	125/34195	3.64252e-06	0.00113131	9	6	3
	Biological process	GO:0080027	response to herbivore	90/34195	6/329	0.000239422	0.0260969	6	0	6
	Molecular function	GO:0051119	sugar transmembrane transporter activity	5/332	82/35936	0.000996207	0.176258	5	2	3
	Molecular function	GO:0015144	carbohydrate transmembrane transporter activity	5/332	103/35936	0.00273199	0.176258	5	2	3
	Molecular function	GO:0004797	thymidine kinase activity	2/332	10/35936	0.00364629	0.176258	2	2	0
	Molecular function	GO:0019136	deoxynucleoside kinase activity	2/332	10/35936	0.00364629	0.176258	2	2	0
	Molecular function	GO:0003964	RNA-directed DNA polymerase activity	9/332	344/35936	0.00499938	0.176258	9	2	7
	Molecular function	GO:0010177	2-(2'-methylthio)ethylmalate synthase activity	2/332	12/35936	0.00528302	0.176258	2	2	0
	Molecular function	GO:0080073	spermidine:coumaroyl CoA N-acyltransferase activity	2/332	12/35936	0.00528302	0.176258	2	2	0
	Molecular function	GO:0010333	terpene synthase activity	64/35936	4/332	0.00293989	0.176258	4	0	4
	Molecular function	GO:0017057	6-phosphogluconolactonase activity	11/35936	2/332	0.00442945	0.176258	2	0	2
	Molecular function	GO:0016838	carbon-oxygen lyase activity, acting on phosphates	72/35936	4/332	0.00449416	0.176258	4	0	4

## Sheet: Supplementary Table S6
Table S6 Differentially expressed genes related to glucosinolates synthesis process between low and high pools.
		FPKM a
Organ	Gnen ID	L1	L2	L3	H1	H2	H3	log2FoldChange	pvalue	Regulated	Swissprot
Leaf	Bo5g113720	0.1	0.14	0.56	1.06	1.19	1.98	2.32941	6.7959e-05	up	BCAT4_ARATH RecName: Full=Methionine aminotransferase BCAT4; EC=2.6.1.88; AltName: Full=Branched-chain-amino-acid aminotransferase 4; Short=Atbcat-4; AltName: Full=Methionine-oxo-acid transaminase BCAT4;
	Bo2g011730	0.58	0.55	0.58	2.1	2.33	1.45	1.72329	1.05375e-05	up	IPM-DH_ARATH RecName: Full=3-isopropylmalate dehydrogenase 1, chloroplastic {ECO:0000303|PubMed:15849421}; Short=3-IPM-DH 1 {ECO:0000303|PubMed:15849421}; Short=AtIMDH1 {ECO:0000303|PubMed:15849421, ECO:0000303|PubMed:19674406}; Short=IMDH 1 {ECO:0000303|PubMed:15849421}; EC=1.1.1.85 {ECO:0000269|PubMed:15849421, ECO:0000269|PubMed:19674406, ECO:0000269|PubMed:20840499}; AltName: Full=Beta-IPM de…
	Bo2g161100	0.93	0.47	0.77	1.26	2.06	1.45	1.07765	0.00341841	up	MAM1_ARATH RecName: Full=Methylthioalkylmalate synthase 1, chloroplastic; EC=2.3.3.17 {ECO:0000269|PubMed:14740211}; AltName: Full=2-isopropylmalate synthase 3; Flags: Precursor;
	Bo7g098000	1	1.35	0.87	3.43	3.07	2.38	1.40844	4.79899e-07	up	MAM2_ARATH RecName: Full=Methylthioalkylmalate synthase 2, chloroplastic; EC=2.3.3.17 {ECO:0000250|UniProtKB:Q9FG67}; Flags: Precursor;
	Bo4g018590	0.49	1.32	1.44	2.39	2.15	2.69	1.09221	0.00837766	up	IPMILEUD1_ARATH RecName: Full=3-isopropylmalate dehydratase small subunit 2 {ECO:0000305}; EC=4.2.1.33 {ECO:0000305|PubMed:19597944}; AltName: Full=2-(omega-methylthio)alkylmalate dehydratase small subunit 2 {ECO:0000305}; EC=4.2.1.170 {ECO:0000269|PubMed:19597944}; AltName: Full=AtLEUD1 {ECO:0000303|PubMed:20663849}; AltName: Full=Isopropylmalate isomerase 2 {ECO:0000305}; AltName: Full=Isopropy…
	Bo5g021810	0.5	0.35	0.53	1.28	1.82	1.29	1.60975	3.22105e-05	up	CYP79F1_ARATH RecName: Full=Dihomomethionine N-hydroxylase; EC=1.14.14.42 {ECO:0000269|PubMed:11133994, ECO:0000269|PubMed:12609033}; AltName: Full=Cytochrome P450 79F1; AltName: Full=Protein BUSHY 1; AltName: Full=Protein SUPERSHOOT 1; AltName: Full=Trihomomethionine N-hydroxylase;萝卜硫素前体
	Bo1g002970	2.61	3.07	2.13	6.46	5.29	5.87	1.11469	3.28093e-09	up	CYP79B1_SINAL RecName: Full=Cytochrome P450 79B1; EC=1.14.-.-;
	Bo01007s020	0.65	0.58	0.64	1.56	2.7	1.92	1.66978	1.97815e-06	up	CYP81F4_ARATH RecName: Full=Cytochrome P450 81F4 {ECO:0000305}; EC=1.14.-.- {ECO:0000305};
	Bo3g153450	0.23	0.29	0.29	1.09	0.48	0.88	1.52244	0.00567766	up	CYP81F4_ARATH RecName: Full=Cytochrome P450 81F4 {ECO:0000305}; EC=1.14.-.- {ECO:0000305};
	Bo3g052490	3.98	5.12	3.65	17.69	16.86	18.17	1.99059	9.24207e-25	up	GSTF2_ARATH RecName: Full=Glutathione S-transferase F2; Short=AtGSTF2; EC=2.5.1.18; AltName: Full=24 kDa auxin-binding protein; Short=AtPM24; AltName: Full=GST class-phi member 2;
	Bo3g052480	12.79	10.17	11.82	31.63	33.46	30.01	1.39618	2.20737e-24	up	GSTF3_ARATH RecName: Full=Glutathione S-transferase F3; Short=AtGSTF3; EC=2.5.1.18; AltName: Full=GST class-phi member 3; AltName: Full=Glutathione S-transferase 16;
	Bo9g005900	0.42	0.48	0.24	1.62	1.65	1.92	2.12957	0.00040165	up	GSTF3_ARATH RecName: Full=Glutathione S-transferase F3; Short=AtGSTF3; EC=2.5.1.18; AltName: Full=GST class-phi member 3; AltName: Full=Glutathione S-transferase 16;
	Bo2g053990	0.65	0.5	1.44	2.25	2.42	1.8	1.26529	0.00263433	up	GSTT3_ARATH RecName: Full=Glutathione S-transferase T3; Short=AtGSTT3; EC=2.5.1.18; AltName: Full=GST class-theta member 3; AltName: Full=Glutathione S-transferase 10C;
	Bo8g070650	1.65	2.25	1.87	7.81	6.73	9.13	1.98012	6.86559e-19	up	IGMT1_ARATH RecName: Full=Indole glucosinolate O-methyltransferase 1 {ECO:0000303|PubMed:21317374}; EC=2.1.1.- {ECO:0000305};
	Bo6g083740	11.68	12.84	14.51	30.07	25.02	28.56	1.0432	3.24736e-20	up	IGMT5_ARATH RecName: Full=Indole glucosinolate O-methyltransferase 5 {ECO:0000305}; EC=2.1.1.- {ECO:0000305};
	Bo00900s090	0.72	0.17	0.76	2.54	1.57	1.86	1.7996	0.0016458	up	UGT80A2 U80A2_ARATH RecName: Full=Sterol 3-beta-glucosyltransferase UGT80A2; EC=2.4.1.173; AltName: Full=UDP-glucose:sterol glucosyltransferase 80A2;
	Bo7g098490	0.55	0.35	0.74	1.41	1.32	1.68	1.3736	0.00539014	up	FMO-GSXL8_ARATH RecName: Full=Flavin-containing monooxygenase FMO GS-OX-like 8 {ECO:0000303|PubMed:17461789}; EC=1.8.-.- {ECO:0000305}; AltName: Full=Flavin-monooxygenase glucosinolate S-oxygenase-like 8 {ECO:0000303|PubMed:17461789};
	Bo3g024610	6.96	8.77	8.69	23.7	14.71	14.1	1.04367	0.000131502	up	TCL1_ARATH RecName: Full=MYB-like transcription factor TCL1; AltName: Full=Protein TRICHOMELESS 1;
	Bo2g013970	0.95	2.07	2.1	3.77	3.69	3.31	1.01204	0.000917132	up	MYB56_ARATH RecName: Full=Transcription factor MYB56 {ECO:0000303|PubMed:9839469}; AltName: Full=Myb-related protein 56 {ECO:0000303|PubMed:9839469}; Short=AtMYB56 {ECO:0000303|PubMed:9839469}; AltName: Full=Protein BRASSINOSTEROIDS AT VASCULAR AND ORGANIZING CENTER {ECO:0000303|PubMed:24981610};
Stalk	Bo6g056440	23.69	22.94	24.16	62.63	65.96	59.06	1.398	7.82998e-42	up	CYP81D1_ARATH RecName: Full=Cytochrome P450 81D1; EC=1.14.-.-;
	Bo6g083740	14.39	14.95	15.07	44.36	43.29	34.5	1.45199	5.55725e-27	up	IGMT5_ARATH RecName: Full=Indole glucosinolate O-methyltransferase 5 {ECO:0000305}; EC=2.1.1.- {ECO:0000305};
	Bo8g105040	3.22	3.07	4.46	19.05	23.01	12.51	2.34079	6.35517e-20	up	GSTUP_ARATH RecName: Full=Glutathione S-transferase U25; Short=AtGSTU25; EC=2.5.1.18; AltName: Full=GST class-tau member 25;
	Bo5g025610	10.31	12.02	11.87	27.98	29.33	21.42	1.19472	4.31771e-14	up	SOT17_ARATH RecName: Full=Cytosolic sulfotransferase 17; Short=AtSOT17; EC=2.8.2.38 {ECO:0000269|PubMed:15358770, ECO:0000269|PubMed:16367753, ECO:0000269|PubMed:19077143}; AltName: Full=Desulfoglucosinolate sulfotransferase C; Short=AtST5c;
	Bo8g092660	1.55	1.57	1.84	5.22	5.04	5.21	1.63017	7.16331e-13	up	GSTT3_ARATH RecName: Full=Glutathione S-transferase T3; Short=AtGSTT3; EC=2.5.1.18; AltName: Full=GST class-theta member 3; AltName: Full=Glutathione S-transferase 10C;
	Bo2g139040	0.4	0.75	0.67	3.28	2.68	2.27	2.16513	5.16779e-10	up	CYP71BY_ARATH RecName: Full=Cytochrome P450 71B37; EC=1.14.-.-;
	Bo6g118360	8.05	7.38	9.75	19.58	19.88	14.27	1.08714	1.15046e-09	up	SOT18_ARATH RecName: Full=Cytosolic sulfotransferase 18; Short=AtSOT18; EC=2.8.2.38 {ECO:0000269|PubMed:16367753, ECO:0000269|PubMed:19077143}; AltName: Full=Desulfo-glucosinolate sulfotransferase B; AltName: Full=Sulfotransferase 5B; Short=AtST5b;
	Bo7g118840	1.61	2.18	1.29	4.63	6.33	3.9	1.54052	3.50853e-09	up	CYP79B1_SINAL RecName: Full=Cytochrome P450 79B1; EC=1.14.-.-;
	Bo6g118380	4.98	3.88	4.34	10.12	12.21	8.18	1.20379	1.60965e-08	up	SOT16_ARATH RecName: Full=Cytosolic sulfotransferase 16; Short=AtSOT16; EC=2.8.2.24 {ECO:0000269|PubMed:19077143}; AltName: Full=Aromatic desulfoglucosinolate sulfotransferase {ECO:0000305}; AltName: Full=Desulfoglucosinolate sulfotransferase A; Short=AtST5a; AltName: Full=Protein CORONATINE INDUCED 7;
	Bo3g081700	3.1	3.58	4.34	0.78	1.05	1.02	-1.96136	1.004e-07	down	MYB15_ARATH RecName: Full=Transcription factor MYB15 {ECO:0000305}; AltName: Full=Myb-related protein 15 {ECO:0000305}; Short=AtMYB15 {ECO:0000312|EMBL:CAA74603.1}; AltName: Full=Myb-related protein Y19 {ECO:0000305}; Short=AtY19 {ECO:0000303|PubMed:8980549};
	novel.4874	1.21	1.63	0.88	3.82	3.09	2.62	1.34724	2.81114e-06	up	BCAT2_ARATH RecName: Full=Branched-chain-amino-acid aminotransferase 2, chloroplastic; Short=Atbcat-2; EC=2.6.1.42; Flags: Precursor;
	Bo6g077200	0.98	1.18	1.46	3.05	3.17	2.39	1.23786	5.84895e-05	up	GSTT3_ARATH RecName: Full=Glutathione S-transferase T3; Short=AtGSTT3; EC=2.5.1.18; AltName: Full=GST class-theta member 3; AltName: Full=Glutathione S-transferase 10C;
	Bo9g175060	2.12	1.46	1.09	3.43	3.23	4.1	1.19489	0.000105182	up	SOT15_ARATH RecName: Full=Cytosolic sulfotransferase 15; Short=AtSOT15; EC=2.8.2.39 {ECO:0000269|PubMed:12637544}; AltName: Full=Sulfotransferase 2a; Short=AtST2a;
	Bo1g144640	5.81	3	3.27	0.31	1.97	1.3	-1.76243	0.000166786	down	GSTU8_ARATH RecName: Full=Glutathione S-transferase U8; Short=AtGSTU8; EC=2.5.1.18; AltName: Full=GST class-tau member 8;
	Bo6g118350	0.1	0.45	0.14	1.31	1.2	0.98	2.30389	0.000214433	up	MYB122 MY122_ARATH RecName: Full=Transcription factor MYB122; AltName: Full=Myb-related protein 122; Short=AtMYB122;
	Bo1g002450	5.67	5.09	4.02	14.44	15.36	17.47	1.66667	1.73481e-08	up	RADL1_ARATH RecName: Full=Protein RADIALIS-like 1; Short=AtRL1; Short=Protein RAD-like 1; AltName: Full=Protein RADIALIS-LIKE SANT/MYB 2; Short=Protein RSM2;
	Bo3g064180	0.39	0.49	0.75	1.53	1.57	1.17	1.38617	0.000174725	up	MAMYB_ARATH RecName: Full=Transcription factor MAMYB {ECO:0000305}; AltName: Full=Membrane-anchored MYB {ECO:0000303|PubMed:21477080};
	Bo5g017150	78.75	72.95	79.03	39.49	36.68	37.41	-1.03198	3.00341e-27	down	FMOGSXL2_ARATH RecName: Full=Flavin-containing monooxygenase FMO GS-OX-like 2; EC=1.8.-.-; AltName: Full=Flavin-monooxygenase glucosinolate S-oxygenase-like 2;
	Bo5g126180	5.95	6.66	5.28	16.67	17.14	14.26	1.41697	4.65574e-17	up	MYBS3_ORYSJ RecName: Full=Transcription factor MYBS3 {ECO:0000303|PubMed:12172034}; AltName: Full=Myb-related protein S3 {ECO:0000303|PubMed:12172034}; Short=OsMYBS3 {ECO:0000303|PubMed:12172034};
	Bo1g082480	9.63	10.93	13.94	4.98	5.34	2.85	-1.3942	3.45966e-09	down	MYB77_ARATH RecName: Full=Transcription factor MYB77 {ECO:0000303|PubMed:11597504}; AltName: Full=Myb-related protein 77 {ECO:0000303|PubMed:11597504}; Short=AtMYB77 {ECO:0000303|PubMed:11597504}; AltName: Full=Myb-related protein R2 {ECO:0000303|PubMed:9678577}; Short=AtMYBR2 {ECO:0000303|PubMed:9678577};
Florte	Bo5g113720	1.45	1.6	0.61	3.74	4.63	3.36	1.69659	1.96171e-07	up	BCAT4_ARATH RecName: Full=Methionine aminotransferase BCAT4; EC=2.6.1.88; AltName: Full=Branched-chain-amino-acid aminotransferase 4; Short=Atbcat-4; AltName: Full=Methionine-oxo-acid transaminase BCAT4;
	Bo2g161100	1.01	0.81	0.54	2.67	2.7	2.56	1.77449	1.03442e-08	up	MAM1_ARATH RecName: Full=Methylthioalkylmalate synthase 1, chloroplastic; EC=2.3.3.17 {ECO:0000269|PubMed:14740211}; AltName: Full=2-isopropylmalate synthase 3; Flags: Precursor;
	Bo7g098000	1.21	1.6	1.5	2.65	3.95	3.91	1.31665	4.90013e-07	up	MAM2_ARATH RecName: Full=Methylthioalkylmalate synthase 2, chloroplastic; EC=2.3.3.17 {ECO:0000250|UniProtKB:Q9FG67}; Flags: Precursor;
	Bo4g018590	3.81	3.42	3.8	8.94	9.99	12.28	1.53376	1.97811e-12	up	IPMI LEUD1_ARATH RecName: Full=3-isopropylmalate dehydratase small subunit 2 {ECO:0000305}; EC=4.2.1.33 {ECO:0000305|PubMed:19597944}; AltName: Full=2-(omega-methylthio)alkylmalate dehydratase small subunit 2 {ECO:0000305}; EC=4.2.1.170 {ECO:0000269|PubMed:19597944}; AltName: Full=AtLEUD1 {ECO:0000303|PubMed:20663849}; AltName: Full=Isopropylmalate isomerase 2 {ECO:0000305}; AltName: Full=Isoprop…
	Bo2g011730	0.64	1	0.71	3.5	3.18	3.75	2.18342	5.61802e-12	up	IPM-DH1 LEU31_ARATH RecName: Full=3-isopropylmalate dehydrogenase 1, chloroplastic {ECO:0000303|PubMed:15849421}; Short=3-IPM-DH 1 {ECO:0000303|PubMed:15849421}; Short=AtIMDH1 {ECO:0000303|PubMed:15849421, ECO:0000303|PubMed:19674406}; Short=IMDH 1 {ECO:0000303|PubMed:15849421}; EC=1.1.1.85 {ECO:0000269|PubMed:15849421, ECO:0000269|PubMed:19674406, ECO:0000269|PubMed:20840499}; AltName: Full=Beta…
	Bo4g130780	13.37	14.27	14.6	36.17	36.25	40.76	1.45346	3.19387e-49	up	CYP83A1_ARATH RecName: Full=Cytochrome P450 83A1; EC=1.14.14.43 {ECO:0000269|PubMed:12970475}; AltName: Full=CYPLXXXIII; AltName: Full=Protein REDUCED EPIDERMAL FLUORESCENCE 2 {ECO:0000303|PubMed:12509530};
	Bo3g018520	10.23	8.84	7.64	21.18	18.94	27.19	1.36493	1.46686e-13	up	CYP20A_ARATH RecName: Full=Peptidyl-prolyl cis-trans isomerase CYP20-1; Short=PPIase CYP20-1; EC=5.2.1.8; AltName: Full=Cyclophilin of 20 kDa 1; AltName: Full=Rotamase CYP20-1; AltName: Full=Rotamase cyclophilin-7; Flags: Precursor;
	Bo1g003710	4.05	6.51	4.42	13.98	9.72	9.78	1.19059	4.45495e-10	up	CYP81F1_ARATH RecName: Full=Cytochrome P450 81F1 {ECO:0000305}; EC=1.14.-.- {ECO:0000305};
	Bo8g065210	1.34	1.68	1.4	3.87	3.56	4.27	1.43677	3.01491e-09	up	CYP71BS_ARATH RecName: Full=Cytochrome P450 71B28; EC=1.14.-.-;
	Bo5g021810	0.66	0.63	0.56	2.04	1.86	1.94	1.68822	3.15689e-07	up	CYP79F1_ARATH RecName: Full=Dihomomethionine N-hydroxylase; EC=1.14.14.42 {ECO:0000269|PubMed:11133994, ECO:0000269|PubMed:12609033}; AltName: Full=Cytochrome P450 79F1; AltName: Full=Protein BUSHY 1; AltName: Full=Protein SUPERSHOOT 1; AltName: Full=Trihomomethionine N-hydroxylase;
	Bo4g191120	0.37	0.03	0.17	1.01	1.25	0.51	2.2691	0.000290419	up	CYP83A1_ARATH RecName: Full=Cytochrome P450 83A1; EC=1.14.14.43 {ECO:0000269|PubMed:12970475}; AltName: Full=CYPLXXXIII; AltName: Full=Protein REDUCED EPIDERMAL FLUORESCENCE 2 {ECO:0000303|PubMed:12509530};
	Bo03247s010	0.11	2.65	2.46	0.17	0.26	0.08	-3.37386	5.12335e-05	down	IGMT4_ARATH RecName: Full=Indole glucosinolate O-methyltransferase 4 {ECO:0000305}; EC=2.1.1.- {ECO:0000305};
	Bo1g057520	0.77	0.75	1.19	2.18	2.19	1.83	1.22215	0.000146912	up	CYP71AG_ARATH RecName: Full=Cytochrome P450 71A16; EC=1.14.-.-; AltName: Full=Marneral oxidase {ECO:0000303|PubMed:28734978};
	Bo3g030260	0.69	0.67	0.5	0.33	0.12	0.13	-1.66043	0.00369678	down	GSTT3_ARATH RecName: Full=Glutathione S-transferase T3; Short=AtGSTT3; EC=2.5.1.18; AltName: Full=GST class-theta member 3; AltName: Full=Glutathione S-transferase 10C;
	Bo7g098590	2.25	2.44	3.43	3.32	5.55	4.84	0.784884	0.00316111	up	MYB28_ARATH RecName: Full=Transcription factor MYB28; AltName: Full=Myb-related protein 28; Short=AtMYB28; AltName: Full=Protein HIGH ALIPHATIC GLUCOSINOLATE 1; AltName: Full=Protein PRODUCTION OF METHIONINE-DERIVED GLUCOSINOLATE 1;
	Bo3g004500	0.61	1.18	1.54	2.27	1.9	1.78	0.874997	0.0272287	up	MYB29_ARATH RecName: Full=Transcription factor MYB29; AltName: Full=Myb-related protein 29; Short=AtMYB29; AltName: Full=Protein HIGH ALIPHATIC GLUCOSINOLATE 3; AltName: Full=Protein PRODUCTION OF METHIONINE-DERIVED GLUCOSINOLATE 2;
a Expected number of fragments per kilobase of transcript sequence per millions base pairs sequenced.

## Sheet: Supplementary Table S7
Table S7 Primer sequences used in qRT-PCR analysis.
Gene name	Primer name	Primer sequence (5ˊ–3ˊ)
Bo5g113720 (BCAT4)	BCAT4 Forward primer	CTTCCTACAAGTGTTTCGGATG
	BCAT4 Reverse primer	CACGATAAGG CTGGTCTGGT
Bo2g161100 (MAM1)	MAM1 Forward primer	GAGTAGACATCATGGAAGTCGGTT
	MAM1 Reverse primer	AAGTCGCCTCAATGTCTCTATGTT
Bo7g098000 (MAM2)	MAM2 Forward primer	AACAAGTCATCCTTGTCTATCTC
	MAM2 Reverse primer	GAGCGTTTTGAGGCTCATCT
Bo5g021810 (CYP79F1)	CYP79F1 Forward primer	GTCACGCCAGACGAAATCAAA
	CYP79F1 Reverse primer	GCACAAGCCTGTCTTTTCCAACT
Bo2g011730 (IPM-DH )	IPM-DH Forward primer	AGGAGCAGCTTTGGATTTGG
	IPM-DH Reverse primer	CATTCCCTCGAATGACCTCC
Bo4g018590 (IPMI)	IPMI Forward primer	TTCATCCCATCTTCCATCTCC
	IPMI Reverse primer	CGGTCCTCTCTAGTTCAGATTTA
Bo7g118840 (CYP79B1)	CYP79B1 Forward primer	ACTTCCACTACTAGGCAAACATG
	CYP79B1 Reverse primer	GATTTGTGACTCTATCGTACGCA
Bo6g056440 (CYP81D1)	CYP81D1 Forward primer	TTATGTCCGTACCGACGAAG
	CYP81D1 Reverse primer	CAACTGATACAAGGCTAGAACTCT
Bo8g092660 (GSTT3)	GSTT3 Forward primer	TTCGGTAACTATGAAGATTGTCACG
	GSTT3 Reverse primer	CTTAACGGCG TATGAAACGC
Bo5g025610 (SOT17)	SOT17 Forward primer	CGATCTTGAAGGCTGGTTGTA
	SOT17 Reverse primer	ACGGCATACACTTCTCCAATC
Bo6g118360 (SOT18)	SOT18 Forward primer	ACCAAAGGAACCCTTCATCGA
	SOT18 Reverse primer	GTCAACACTTCAGTGCAACATTC
Bo6g118380 (SOT16)	SOT16 Forward primer	GGCAAGAATGTCTCCTCGAA
	SOT16 Reverse primer	TTCTTGGTCGAAATGAGGTGG
Actin	actin-12 Forward primer	GGCTCTATCTTGGCTTCTCTCAGT
	actin-12 Reverse primer	CCAGATTCATCATACTCGGCTTT

## Sheet: Supplementary Table S8
Tables S8 Categories of the metabolites identified in leaf, stalk and floret of F2 plants, respectively.
Category	Number of metabolites in leaves	Number of metabolites in stalks	Number of metabolites in florets
Phenolic acids	138	133	187
Lipids	131	127	136
Others	110	110	146
Amino acids and derivatives	95	95	113
Flavonoids	86	76	109
Organic acids	58	56	91
Alkaloids	57	56	102
Nucleotides and derivatives	55	54	66
Lignans and Coumarins	21	21	43
Terpenoids	6	6	9
Total	757	734	1002

## Sheet: Supplementary Table S9
Table S9 Co-regulated differential metabolites in leaf, stalk and floret.
Organ	Compounds	Category	p_value	Log2FC	Type
Common in leaf and stalk	Sulforaphane (4-methylsulphinylbutyl glucosinolate)	Glucosinolates	0.000572652	1.76103	up
	2(R)-Hydroxy-3-butenyl glucosinolate	Glucosinolates	0.0129114	-1.5611	down
	2-Hydroxy-2-methylpropylglucosinolate	Glucosinolates	0.00202786	-1.60195	down
	Glucocheirolin	Glucosinolates	0.00521557	1.3385	up
	Quercetin-7-O-glucoside*	Flavonols	0.106194	9.2633	up
	Kaempferol-3-O-sophorotrioside-7-O-glucoside	Flavonols	0.199796	-9.87845	down
	Methyl 4-hydroxybenzoate*	Phenolic acids	0.0676324	-10.4296	down
	Dicaffeoylquinic acid-O-glucoside	Phenolic acids	0.183529	-9.6061	down
Common in leaf and floret	Sulforaphane (4-methylsulphinylbutyl glucosinolate)	Glucosinolates	0.00108968	1.20805	up
	Glucocheirolin	Glucosinolates	0.0445813	1.20145	up
	Hesperetin-5-O-glucoside	Flavanones	6.81752e-06	-2.73695	down
	Apigenin-7-O-glucoside(Cosmosiin)*	Flavones	0.00440247	1.02478	up
	Quercetin-7-O-glucoside*	Flavonols	0.00500069	-2.65992	down
	Isorhamnetin-7-O-glucoside (Brassicin)*	Flavonols	0.00635243	-1.00285	down
	Quercetin-3,7-Di-O-glucoside	Flavonols	0.0042439	-1.37677	down
	Caulilexin C	Plumerane	0.0102325	1.16363	up
Common in stalk and floret	Sulforaphane (4-methylsulphinylbutyl glucosinolate)	Glucosinolates	0.000572652	1.76103	up
	Glucocheirolin	Glucosinolates	0.00521557	1.3385	up
	4-Methylsulfinylbutyl glucosinolate (Glucoraphanin)	Glucosinolates	9.8403e-05	1.10125	up
	Naringenin-7-O-glucoside (Prunin)	Flavanones	0.232317	6.28264	up
	Quercetin-7-O-glucoside*	Flavonols	0.106194	9.2633	up
	Kaempferol-3-O-galactoside-4'-O-glucoside	Flavonols	0.00299214	1.27354	up
	Luteolin-7,3'-di-O-glucoside	Flavones	0.00299214	1.27354	up
	Isorhamnetin-3-O-sophoroside	Flavonols	0.00264116	2.08932	up
	Skimmin (7-Hydroxycoumarin-7-O-glucoside)	Coumarins	0.00220877	12.5847	up
Common in leaf , stalk and floret	Sulforaphane (4-methylsulphinylbutyl glucosinolate)	Glucosinolates	0.000572652	1.76103	up
	Glucocheirolin	Glucosinolates	0.00521557	1.3385	up
	Quercetin-7-O-glucoside*	Flavonols	0.106194	9.2633	up

## Sheet: Supplementary Table S10
Table S10 DEGs related to plant hormone signal transduction between high and low RAA content.
Organ	Gene ID	Swissprot	Regulated	log2FoldChange	P-value
Stalk	Bo6g112300	TIF7_ARATH RecName: Full=Protein TIFY 7; AltName: Full=Jasmonate ZIM domain-containing protein 9;	up	1.78924	2.54182e-67
	Bo2g068460	TIF7_ARATH RecName: Full=Protein TIFY 7; AltName: Full=Jasmonate ZIM domain-containing protein 9;	up	1.16428	1.14659e-31
	Bo6g094620	TIF7_ARATH RecName: Full=Protein TIFY 7; AltName: Full=Jasmonate ZIM domain-containing protein 9;	up	1.74029	9.56205e-30
	Bo3g039200	JAR1_ARATH RecName: Full=Jasmonoyl--L-amino acid synthetase JAR1 {ECO:0000305}; EC=6.3.2.52 {ECO:0000269|PubMed:18247047}; AltName: Full=Jasmonate-amino acid synthetase JAR1 {ECO:0000305}; AltName: Full=Jasmonic acid-amido synthetase JAR1 {ECO:0000305}; AltName: Full=Protein FAR-RED INSENSITIVE 219 {ECO:0000303|PubMed:10921909}; AltName: Full=Protein JASMONATE RESISTANT 1 {ECO:0000303|PubMed:1160…	up	1.37642	3.24935e-12
	Bo9g168900	TIF9_ARATH RecName: Full=Protein TIFY 9; AltName: Full=Jasmonate ZIM domain-containing protein 10; AltName: Full=Protein JASMONATE-ASSOCIATED 1; AltName: Full=Protein JAZ10;	up	1.21271	9.79484e-08
	Bo4g196110	JAR1_ARATH RecName: Full=Jasmonoyl--L-amino acid synthetase JAR1 {ECO:0000305}; EC=6.3.2.52 {ECO:0000269|PubMed:18247047}; AltName: Full=Jasmonate-amino acid synthetase JAR1 {ECO:0000305}; AltName: Full=Jasmonic acid-amido synthetase JAR1 {ECO:0000305}; AltName: Full=Protein FAR-RED INSENSITIVE 219 {ECO:0000303|PubMed:10921909}; AltName: Full=Protein JASMONATE RESISTANT 1 {ECO:0000303|PubMed:1160…	up	1.9198	8.75869e-05
	Bo8g100590	GH3-3_ARATH RecName: Full=Indole-3-acetic acid-amido synthetase GH3.3; EC=6.3.2.-; AltName: Full=Auxin-responsive GH3-like protein 3; Short=AtGH3-3;	up	3.15763	1.44707e-21
	Bo1g010580	IAA29_ARATH RecName: Full=Auxin-responsive protein IAA29; AltName: Full=Indoleacetic acid-induced protein 29;	up	4.02548	6.96799e-13
	Bo7g078110	IAA32_ARATH RecName: Full=Auxin-responsive protein IAA32 {ECO:0000303|PubMed:12036262}; AltName: Full=Indoleacetic acid-induced protein 32 {ECO:0000303|PubMed:12036262};	up	1.72437	4.09432e-08
	Bo9g111470	SAU32_ARATH RecName: Full=Auxin-responsive protein SAUR32 {ECO:0000305}; AltName: Full=Protein ABOLISHED APICAL HOOK MAINTENANCE 1 {ECO:0000303|Ref.6}; AltName: Full=Protein SMALL AUXIN UP RNA 32 {ECO:0000303|PubMed:12036261};	down	-1.02482	3.81781e-06
	Bo3g040330	SAU50_ARATH RecName: Full=Auxin-responsive protein SAUR50 {ECO:0000303|PubMed:12036261}; AltName: Full=Protein SMALL AUXIN UP RNA 50 {ECO:0000303|PubMed:12036261};	down	-2.30585	4.64513e-05
	Bo2g136230	SAU20_ARATH RecName: Full=Auxin-responsive protein SAUR20 {ECO:0000305}; AltName: Full=Protein SMALL AUXIN UP RNA 20 {ECO:0000303|PubMed:12036261};	up	1.18837	0.00010096
	Bo9g023750	GH3-1_ARATH RecName: Full=Probable indole-3-acetic acid-amido synthetase GH3.1; EC=6.3.2.-; AltName: Full=Auxin-responsive GH3-like protein 1; Short=AtGH3-1;	up	2.20858	0.000171524
	Bo2g136210	SAU21_ARATH RecName: Full=Auxin-responsive protein SAUR21 {ECO:0000305}; AltName: Full=Protein SMALL AUXIN UP RNA 21 {ECO:0000303|PubMed:12036261};	up	1.07292	0.00117357
	Bo8g105960	IAA5_ARATH RecName: Full=Auxin-responsive protein IAA5; AltName: Full=Auxin-induced protein AUX2-27; AltName: Full=Indoleacetic acid-induced protein 5;	up	1.00238	0.00129655
	Bo6g079230	IAA30_ARATH RecName: Full=Auxin-responsive protein IAA30; AltName: Full=Indoleacetic acid-induced protein 30;	up	1.20524	0.0013372
Floret	Bo5g027170	TI10A_ARATH RecName: Full=Protein TIFY 10A; AltName: Full=Jasmonate ZIM domain-containing protein 1;	down	-1.1118	1.78675e-06
	Bo5g027860	SAU50_ARATH RecName: Full=Auxin-responsive protein SAUR50 {ECO:0000303|PubMed:12036261}; AltName: Full=Protein SMALL AUXIN UP RNA 50 {ECO:0000303|PubMed:12036261};	up	1.03443	9.71051e-07
	Bo7g119580	AXX15_SOYBN RecName: Full=Auxin-induced protein X15;	down	-1.51486	0.000622351
	Bo3g081600	IAA7_ARATH RecName: Full=Auxin-responsive protein IAA7; AltName: Full=Auxin resistant 2; AltName: Full=Indoleacetic acid-induced protein 7;	up	1.28285	0.000796655

[truncated: 2 more sheets: Supplementary Table S11, Supplementary Table S12]
